# Supplementary material
Source: PubMed Central journal article supplement (PMC4396657)
Supplement: NIHMS668518-supplement-1.pdf [file NIHMS668518-supplement-1.pdf]

## SUPPLEMENTARY FIGURES

**a**

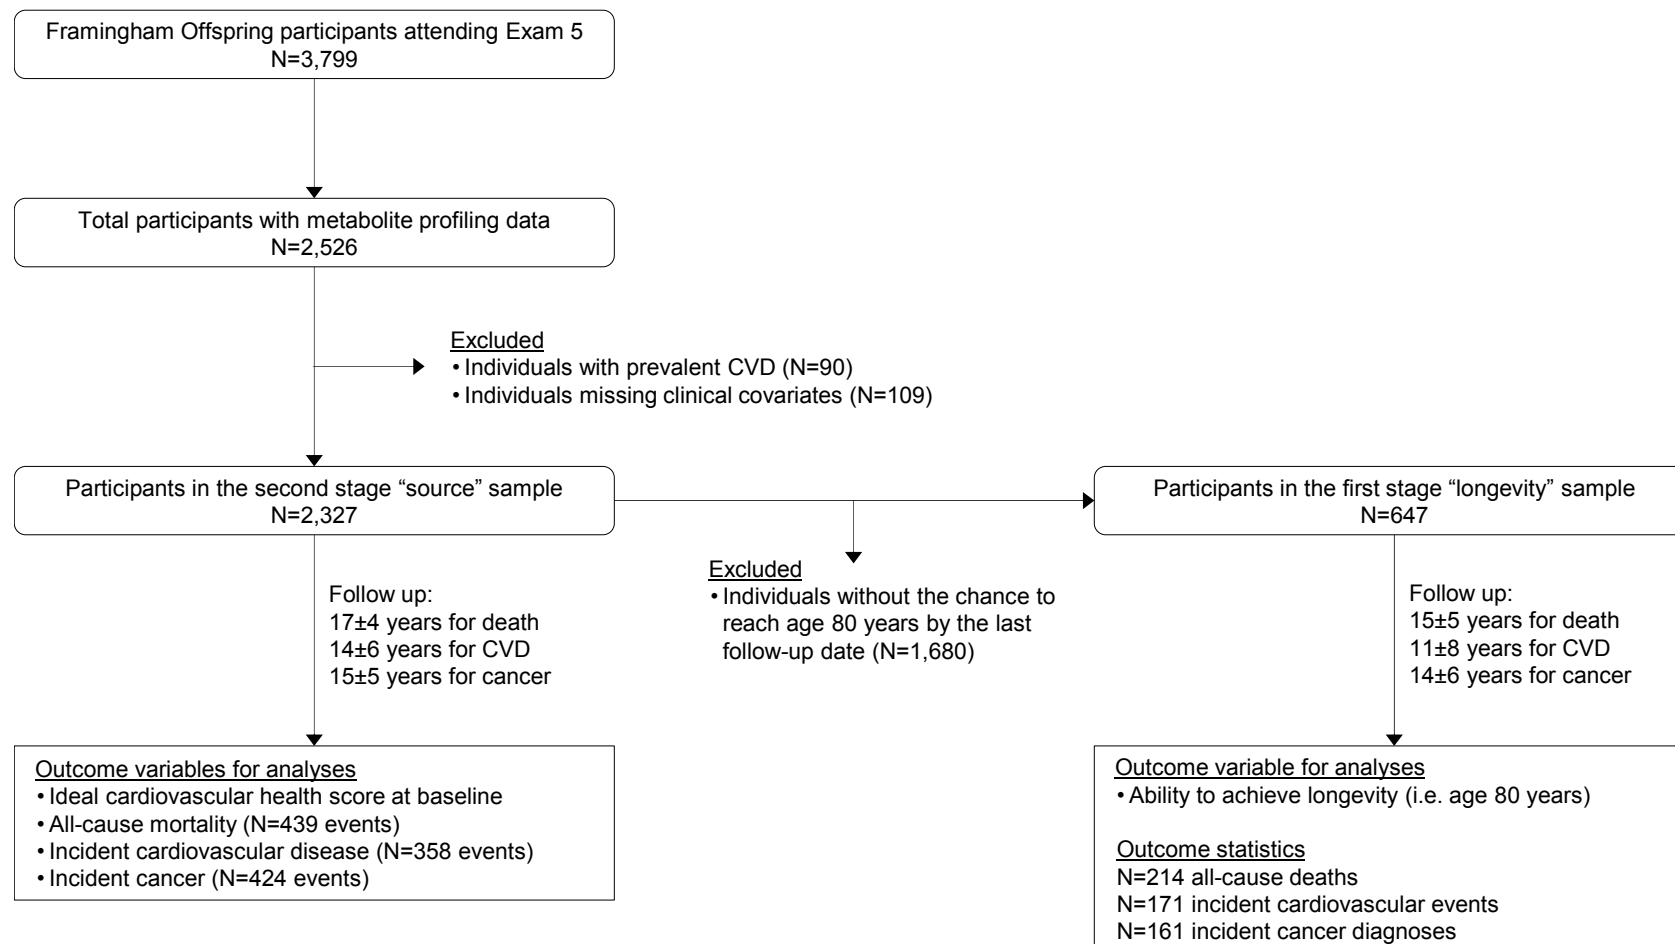

**b**

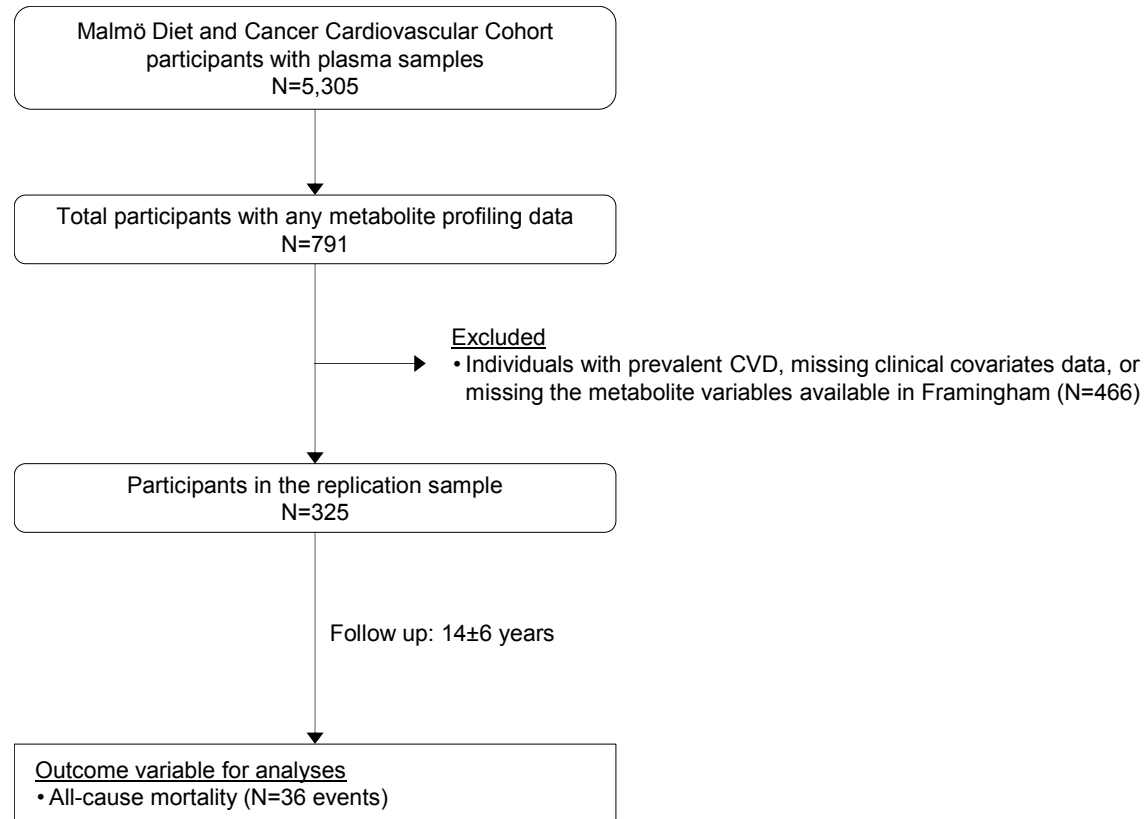

**Supplementary Figure 1. Sampling strategy for the longevity analyses.** The approach to sampling individuals for longevity analyses from both the Framingham Heart Study (a) and Malmö Diet and Cancer study (b) cohorts is shown.

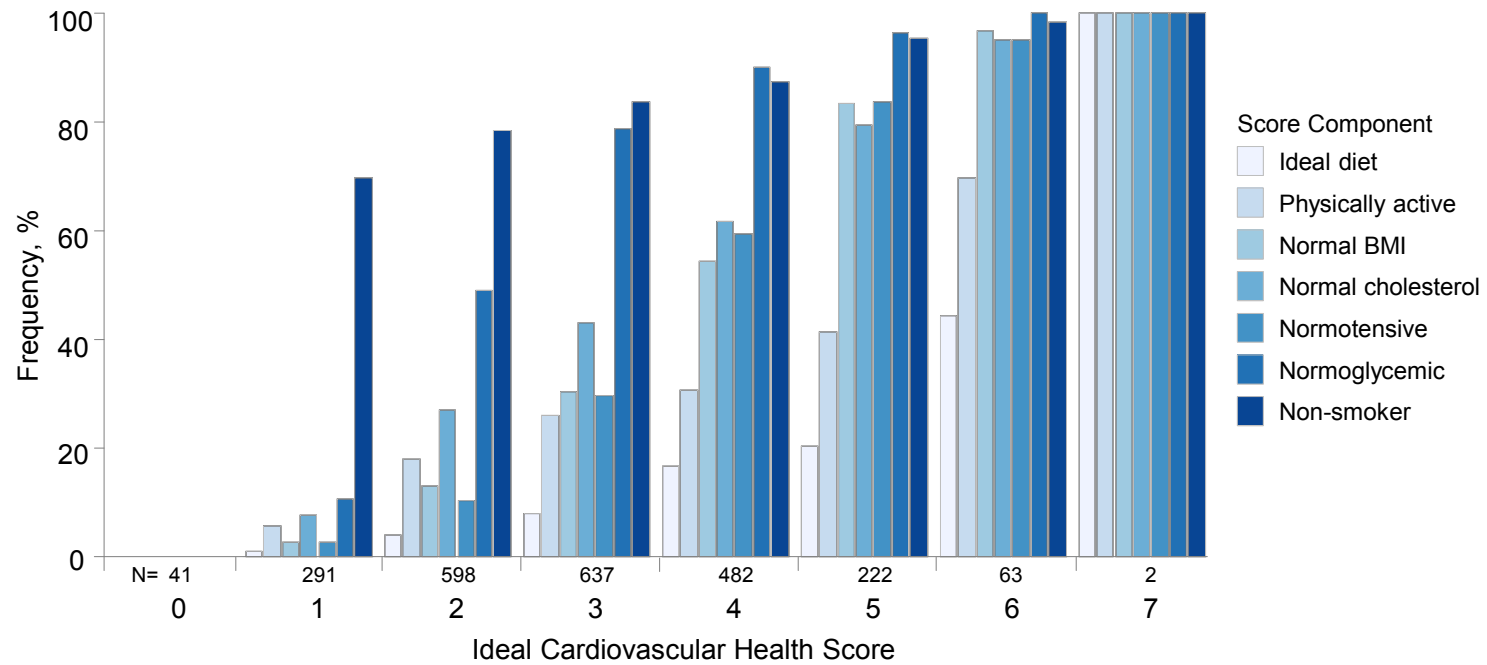

**Supplementary Figure 2. Distribution of cardiovascular health score components.** Frequency of cardiovascular health components contributing to increasing ‘ideal cardiovascular health score’ is shown for the total study sample (N=2327).

**a**

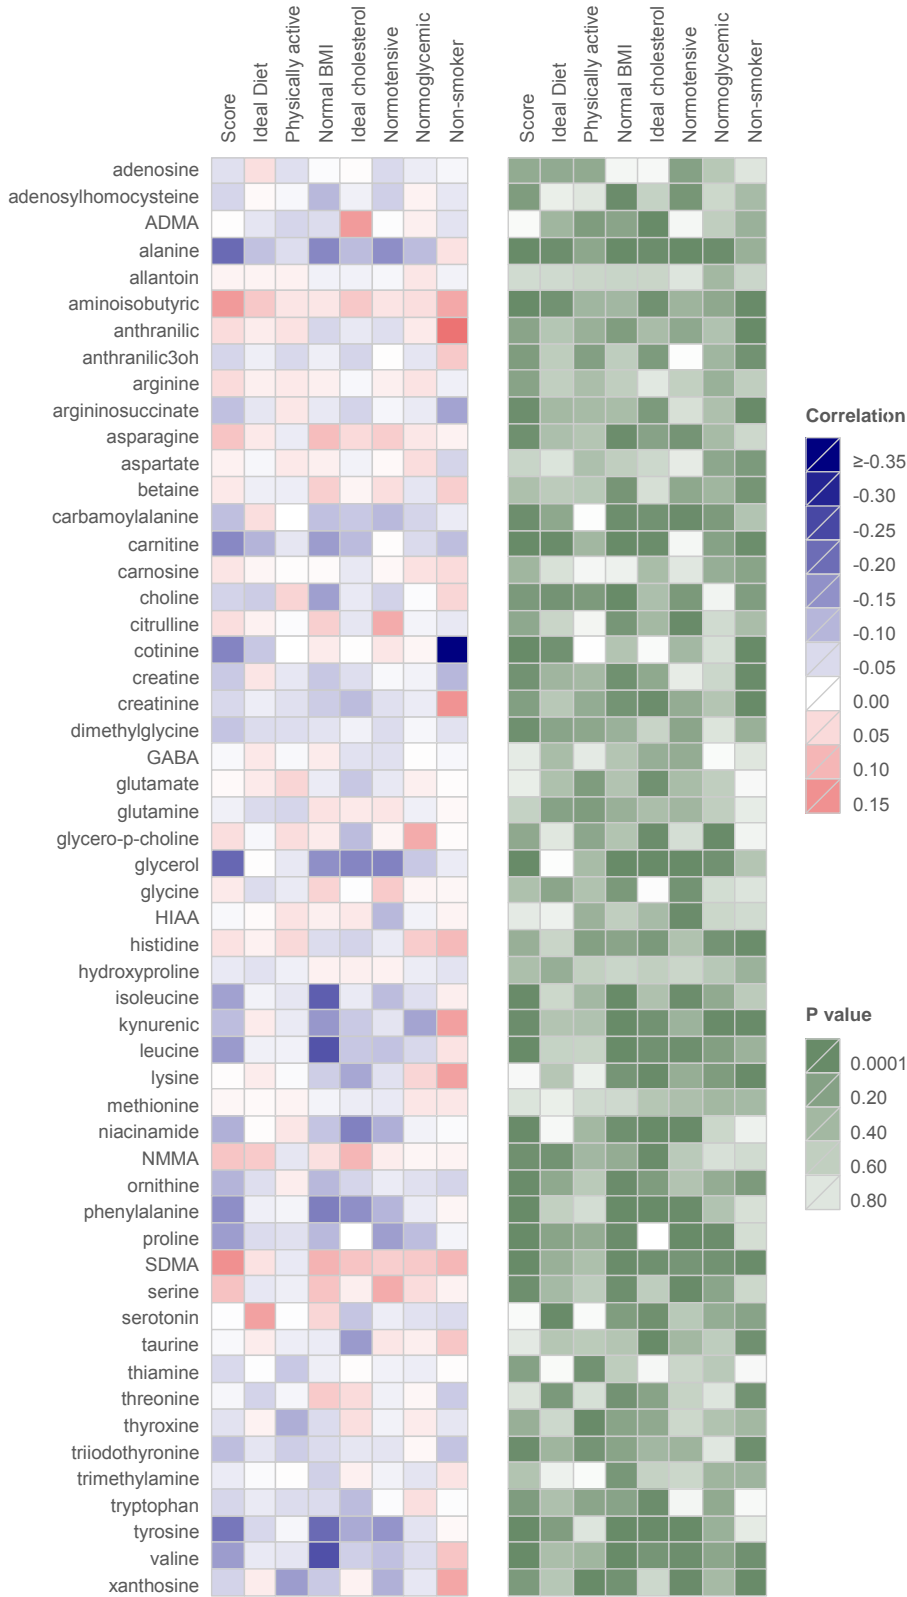

**b**

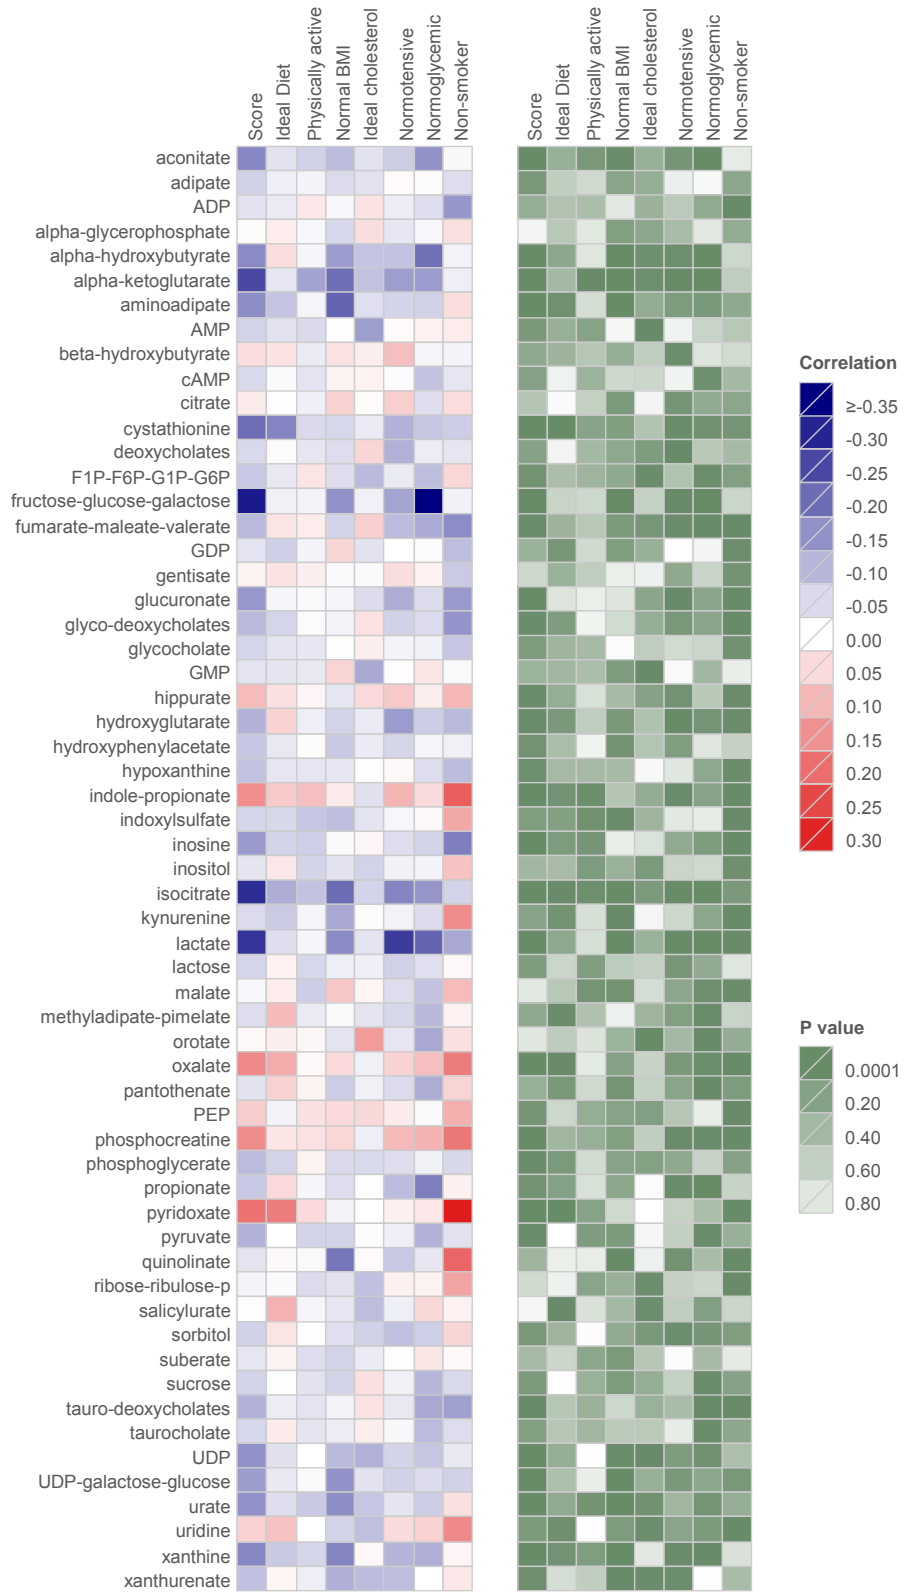

**c**

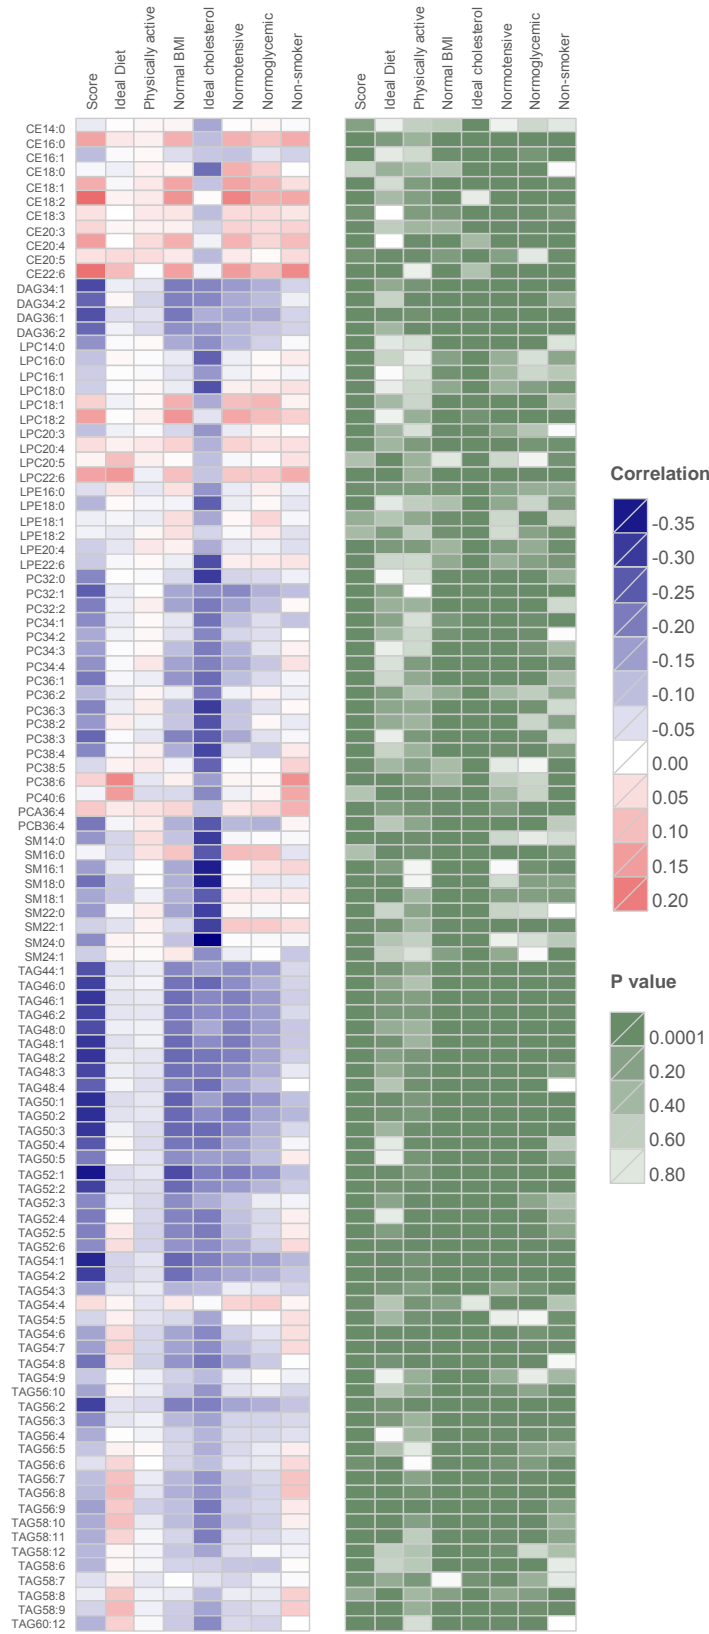

**Supplementary Figure 3. Associations between metabolites and components of the ideal cardiovascular health score.** Age- and sex-adjusted Spearman correlation coefficients are shown with corresponding P values for polar positively charged metabolites **(a)**, polar negatively charge metabolites **(b)**, and lipid metabolites **(c)**.

**SUPPLMENTARY TABLES**

**Supplementary Table 1. Morbidity Profiles for Individuals in the Longevity Sample by Sex\***

| <b>Characteristics</b>                        | <b>Total<br/>N=682</b> | <b>Men<br/>N=332</b> | <b>Women<br/>N=350</b> |
|-----------------------------------------------|------------------------|----------------------|------------------------|
| Achieved longevity (age 80 years), %          | 79                     | 71                   | 86                     |
| Cardiovascular profile, %                     |                        |                      |                        |
| Survivor                                      | 2                      | 3                    | 1                      |
| Delayer                                       | 19                     | 18                   | 21                     |
| Escaper                                       | 58                     | 51                   | 65                     |
| Cancer profile, %                             |                        |                      |                        |
| Survivor                                      | 7                      | 7                    | 7                      |
| Delayer                                       | 14                     | 16                   | 11                     |
| Escaper                                       | 58                     | 48                   | 67                     |
| Combined cardiovascular and cancer profile, % |                        |                      |                        |
| Survivor                                      | 9                      | 9                    | 8                      |
| Delayer                                       | 28                     | 29                   | 27                     |
| Escaper                                       | 42                     | 33                   | 51                     |

\*Survivors developed the outcome(s) before age 70; delayers developed the outcome(s) at age 70 or after; and, escapers never developed the outcome(s).



**Supplementary Table 2. Metabolites Associated with Attaining Longevity Defined as 85 Years of Age (Sample: N=329)**

| Profiling Method          | Metabolite           | Age- and Sex-Adjusted |         | Multivariable-Adjusted <sup>†</sup> |         |
|---------------------------|----------------------|-----------------------|---------|-------------------------------------|---------|
|                           |                      | OR (95% CI)           | P value | OR (95% CI)                         | P value |
| Polar, positively charged | cotinine             | 0.62 (0.46-0.83)      | 0.001   | 0.59 (0.36-0.96)                    | 0.03    |
|                           | histidine            | 1.20 (0.95-1.53)      | 0.13    | 1.16 (0.90-1.51)                    | 0.26    |
|                           | lysine               | 1.30 (1.00-1.69)      | 0.05    | 1.28 (0.97-1.70)                    | 0.08    |
|                           | threonine            | 1.07 (0.83-1.38)      | 0.58    | 0.98 (0.75-1.29)                    | 0.90    |
| Polar, negatively charged | aconitate            | 0.69 (0.52-0.91)      | 0.01    | 0.76 (0.57-1.03)                    | 0.08    |
|                           | beta-hydroxybutyrate | 0.75 (0.57-0.99)      | 0.04    | 0.79 (0.59-1.07)                    | 0.12    |
|                           | isocitrate           | 0.60 (0.43-0.82)      | 0.001   | 0.70 (0.49-0.99)                    | 0.04    |
|                           | malate               | 0.81 (0.63-1.02)      | 0.08    | 0.87 (0.68-1.12)                    | 0.29    |
|                           | taurocholate         | 0.88 (0.67-1.15)      | 0.34    | 0.90 (0.67-1.21)                    | 0.48    |
|                           | uridine              | 2.19 (1.60-3.00)      | 9.0E-07 | 2.07 (1.49-2.88)                    | 1.6E-05 |
| Lipid                     | LPC 22:6             | 1.24 (0.96-1.60)      | 0.10    | 1.08 (0.81-1.42)                    | 0.61    |
|                           | PC 38:6              | 1.24 (0.95-1.62)      | 0.12    | 1.19 (0.88-1.62)                    | 0.25    |

LPC, lysophosphatidylcholine; PC, phosphatidylcholine.

\*Metabolites were natural log transformed and standardized (mean=0, sd=1).

<sup>†</sup>All logistic regression analyses adjusted for age and sex; multivariable-adjusted models additionally adjusted for body mass index, systolic blood pressure, anti-hypertensive treatment, diabetes, smoking status, total cholesterol, HDL cholesterol, and log triglycerides.

**Supplementary Table 3. Metabolites Associated with Attaining Longevity Defined as 75 Years of Age (Sample: N=996)**

| Profiling Method          | Metabolite           | Age- and Sex-Adjusted |         | Multivariable-Adjusted† |         |
|---------------------------|----------------------|-----------------------|---------|-------------------------|---------|
|                           |                      | OR (95% CI)           | P value | OR (95% CI)             | P value |
| Polar, positively charged | cotinine             | 0.84 (0.69-1.03)      | 0.09    | 1.08 (0.76-1.54)        | 0.68    |
|                           | histidine            | 1.13 (0.93-1.37)      | 0.21    | 1.11 (0.91-1.36)        | 0.30    |
|                           | lysine               | 1.17 (0.95-1.43)      | 0.14    | 1.19 (0.96-1.47)        | 0.11    |
|                           | threonine            | 1.32 (1.07-1.64)      | 0.01    | 1.28 (1.02-1.59)        | 0.03    |
| Polar, negatively charged | aconitate            | 0.87 (0.69-1.10)      | 0.25    | 0.93 (0.73-1.19)        | 0.55    |
|                           | beta-hydroxybutyrate | 0.77 (0.62-0.95)      | 0.01    | 0.75 (0.60-0.95)        | 0.01    |
|                           | isocitrate           | 0.76 (0.60-0.96)      | 0.02    | 0.81 (0.63-1.05)        | 0.11    |
|                           | malate               | 0.79 (0.64-0.97)      | 0.03    | 0.83 (0.67-1.02)        | 0.08    |
|                           | taurocholate         | 0.69 (0.54-0.90)      | 0.006   | 0.70 (0.54-0.92)        | 0.01    |
|                           | uridine              | 1.07 (0.86-1.34)      | 0.56    | 1.02 (0.81-1.29)        | 0.87    |
| Lipid                     | LPC 22:6             | 1.14 (0.91-1.44)      | 0.26    | 1.11 (0.87-1.41)        | 0.40    |
|                           | PC 38:6              | 1.21 (0.96-1.53)      | 0.11    | 1.22 (0.95-1.57)        | 0.11    |

LPC, lysophosphatidylcholine; PC, phosphatidylcholine.

\*Metabolites were natural log transformed and standardized (mean=0, sd=1).

†All logistic regression analyses adjusted for age and sex; multivariable-adjusted models additionally adjusted for body mass index, systolic blood pressure, anti-hypertensive treatment, diabetes, smoking status, total cholesterol, HDL cholesterol, and log triglycerides.

**Supplementary Table 4. Metabolites Associated with Attaining Longevity Defined as 70 Years of Age (Sample: N=1248)**

| Profiling Method          | Metabolite           | Age- and Sex-Adjusted |         | Multivariable-Adjusted† |         |
|---------------------------|----------------------|-----------------------|---------|-------------------------|---------|
|                           |                      | OR (95% CI)           | P value | OR (95% CI)             | P value |
| Polar, positively charged | cotinine             | 0.85 (0.68-1.06)      | 0.14    | 0.84 (0.57-1.25)        | 0.39    |
|                           | histidine            | 1.21 (0.98-1.50)      | 0.07    | 1.19 (0.96-1.48)        | 0.11    |
|                           | lysine               | 1.02 (0.81-1.27)      | 0.88    | 1.05 (0.84-1.33)        | 0.66    |
|                           | threonine            | 1.33 (1.04-1.69)      | 0.02    | 1.29 (1.01-1.65)        | 0.05    |
| Polar, negatively charged | aconitate            | 0.78 (0.59-1.03)      | 0.08    | 0.88 (0.65-1.19)        | 0.40    |
|                           | beta-hydroxybutyrate | 0.77 (0.62-0.97)      | 0.02    | 0.78 (0.61-1.00)        | 0.05    |
|                           | isocitrate           | 0.69 (0.53-0.90)      | 0.006   | 0.77 (0.57-1.03)        | 0.07    |
|                           | malate               | 0.79 (0.62-1.01)      | 0.06    | 0.83 (0.64-1.07)        | 0.15    |
|                           | taurocholate         | 0.85 (0.63-1.13)      | 0.25    | 0.86 (0.64-1.16)        | 0.33    |
|                           | uridine              | 0.96 (0.75-1.22)      | 0.74    | 0.95 (0.74-1.23)        | 0.70    |
| Lipid                     | LPC 22:6             | 1.31 (1.01-1.68)      | 0.04    | 1.27 (0.97-1.66)        | 0.08    |
|                           | PC 38:6              | 1.29 (1.01-1.66)      | 0.05    | 1.34 (1.02-1.77)        | 0.03    |

LPC, lysophosphatidylcholine; PC, phosphatidylcholine.

\*Metabolites were natural log transformed and standardized (mean=0, sd=1).

†All logistic regression analyses adjusted for age and sex; multivariable-adjusted models additionally adjusted for body mass index, systolic blood pressure, anti-hypertensive treatment, diabetes, smoking status, total cholesterol, HDL cholesterol, and log triglycerides.

**Supplementary Table 5. Characteristics of the Malmö Diet and Cancer Study Replication Sample**

| <b>Clinical Characteristics</b>    | <b>Malmö Sample<br/>N=325</b> |
|------------------------------------|-------------------------------|
| Age, years                         | 57.5±5.8                      |
| Female, %                          | 55                            |
| Body mass index, kg/m <sup>2</sup> | 28.3±4.9                      |
| Systolic blood pressure, mmHg      | 145±18                        |
| Diastolic blood pressure, mmHg     | 89±10                         |
| Hypertension, %                    | 65                            |
| Treatment for hypertension, %      | 23                            |
| Total cholesterol, mg/dL           | 244±42                        |
| HDL cholesterol, mg/dL             | 49±12                         |
| Total/HDL cholesterol              | 5.3±1.6                       |
| Triglycerides, mg/dL*              | 144±67                        |
| Fasting glucose, mg/dL             | 97±8                          |
| Treatment for diabetes, %          | 0                             |
| Diabetes, %                        | 0                             |
| Current smoker, %                  | 27                            |

**Supplementary Table 6. Age- and Sex-Adjusted Associations of Selected Metabolites with the Ideal Cardiovascular Health Score**

| Metabolite                      |                          | Model Adjusting for<br>Age and Sex | Model Adjusting for Age, Sex, and<br>Ideal Cardiovascular Health Score |
|---------------------------------|--------------------------|------------------------------------|------------------------------------------------------------------------|
|                                 |                          | Total R <sup>2</sup>               | Total R <sup>2</sup>                                                   |
| Polar,<br>positively<br>charged | cotinine                 | 0.0112                             | 0.0810                                                                 |
|                                 | histidine                | 0.0174                             | 0.0200                                                                 |
|                                 | lysine                   | 0.0346                             | 0.0354                                                                 |
|                                 | threonine                | 0.0233                             | 0.0261                                                                 |
| Polar,<br>negatively<br>charged | aconitate                | 0.1164                             | 0.1374                                                                 |
|                                 | $\beta$ -hydroxybutyrate | 0.0115                             | 0.0115                                                                 |
|                                 | isocitrate               | 0.1393                             | 0.1983                                                                 |
|                                 | malate                   | 0.0463                             | 0.0491                                                                 |
|                                 | taurocholate             | 0.0164                             | 0.0164                                                                 |
|                                 | uridine                  | 0.0054                             | 0.0072                                                                 |
| Lipid                           | LPC22:6                  | 0.0505                             | 0.0673                                                                 |
|                                 | PC38:6                   | 0.0566                             | 0.0611                                                                 |

**Supplementary Table 7. Results of Metabolomic Pathway Topology Analysis**

| <b>Pathway</b>                             | <b>Total No. Analytes*</b> | <b>Exp.</b> | <b>Act.</b> | <b>Analyte Associated with Longevity (KEGG compound name): Importance</b> | <b>Raw</b> | <b>Holm</b> | <b>FDR</b> | <b>Impact</b> |
|--------------------------------------------|----------------------------|-------------|-------------|---------------------------------------------------------------------------|------------|-------------|------------|---------------|
| Citrate cycle (TCA cycle)                  | 20                         | 0.058       | 2           | Isocitric acid (C00311): 0.058<br>cis-Aconitic acid (C00417): 0.055       | 0.001      | 0.11        | 0.11       | 0.113         |
| Butanoate metabolism                       | 40                         | 0.116       | 2           | (R)-Malate (C00497): 0.026<br>(R)-3-Hydroxybutyric acid (C01089): 0.005   | 0.005      | 0.42        | 0.21       | 0.031         |
| Glyoxylate and dicarboxylate metabolism    | 50                         | 0.145       | 2           | Isocitric acid (C00311): 0.025<br>cis-Aconitic acid (C00417): 0.003       | 0.008      | 0.65        | 0.22       | 0.028         |
| Synthesis and degradation of ketone bodies | 6                          | 0.017       | 1           | (R)-3-Hydroxybutyric acid (C01089): 0                                     | 0.017      | 1           | 0.35       | 0             |
| Taurine and hypotaurine metabolism         | 20                         | 0.058       | 1           | Taurocholic acid (C05122): 0                                              | 0.057      | 1           | 0.91       | 0             |
| Glycerophospholipid metabolism             | 39                         | 0.113       | 1           | LPC 22:6 / PC 38:6 (C04230): 0.003                                        | 0.11       | 1           | 1          | 0.003         |
| Primary bile acid biosynthesis             | 47                         | 0.137       | 1           | Taurocholic acid (C05122): 0.008                                          | 0.13       | 1           | 1          | 0.009         |

\*Total number of analytes in the KEGG pathway.

Exp, number of analytes expected to be found by chance. Act, number of analytes actually found in association with the outcome. Raw, original P value calculated from enrichment analysis based on hypergeometric tests of relative betweenness centrality. Holm, P value is corrected for multiple testing using the Holm-Bonferroni method. FDR, P value is adjusted using the false discovery rate. Impact, pathway impact value calculated from pathway topology analysis, as the sum of the importance measures of all metabolites in each pathway.

**Supplementary Table 8. Sample Size and Frequency of Longevity Achieved According to Varying Age Thresholds for Defining Longevity in the Framingham Cohort**

| <b>Longevity defined as ability to reach...</b> | <b>Total Persons with Chance to Achieve Longevity</b> | <b>Achieved Longevity</b> | <b>Did Not Achieve Longevity</b> |
|-------------------------------------------------|-------------------------------------------------------|---------------------------|----------------------------------|
| Age 85                                          | 329                                                   | 215 (65%)                 | 114 (35%)                        |
| Age 80                                          | 647                                                   | 514 (79%)                 | 133 (21%)                        |
| Age 75                                          | 996                                                   | 881 (88%)                 | 115 (12%)                        |
| Age 70                                          | 1248                                                  | 1166 (93%)                | 82 (7%)                          |

**Supplementary Table 9. Metabolite clusters derived from principal components analyses: HILIC method**

| Cluster    | Metabolite                  | R <sup>2</sup> |              |
|------------|-----------------------------|----------------|--------------|
|            |                             | Own Cluster    | Next Closest |
| Cluster 1  | isoleucine                  | 0.76           | 0.30         |
|            | leucine                     | 0.83           | 0.27         |
|            | methionine                  | 0.54           | 0.35         |
|            | phenylalanine               | 0.55           | 0.20         |
|            | tryptophan                  | 0.39           | 0.12         |
|            | tyrosine                    | 0.54           | 0.26         |
|            | valine                      | 0.72           | 0.25         |
| Cluster 2  | asparagine                  | 0.47           | 0.08         |
|            | glutamate                   | 0.68           | 0.17         |
|            | glutamine                   | 0.74           | 0.11         |
|            | anthranilic                 | 0.48           | 0.15         |
|            | alpha-glycerophosphocholine | 0.52           | 0.21         |
|            | thiamine                    | 0.38           | 0.09         |
| Cluster 3  | aminoisobutyric             | 0.26           | 0.08         |
|            | betaine                     | 0.48           | 0.08         |
|            | choline                     | 0.52           | 0.17         |
|            | dimethylglycine             | 0.54           | 0.13         |
|            | citrulline                  | 0.41           | 0.17         |
|            | NG-monomethyl-arginine      | 0.41           | 0.14         |
| Cluster 4  | histidine                   | 0.65           | 0.16         |
|            | lysine                      | 0.65           | 0.32         |
|            | threonine                   | 0.47           | 0.17         |
|            | ornithine                   | 0.51           | 0.23         |
| Cluster 5  | creatinine                  | 0.53           | 0.19         |
|            | xanthosine                  | 0.48           | 0.13         |
|            | kynurenic                   | 0.50           | 0.12         |
|            | trimethylamine              | 0.25           | 0.06         |
|            | 5-hydroxyindoleacetic acid  | 0.19           | 0.03         |
| Cluster 6  | niacinamide                 | 0.36           | 0.08         |
|            | taurine                     | 0.51           | 0.09         |
|            | serotonin                   | 0.57           | 0.02         |
| Cluster 7  | alanine                     | 0.55           | 0.28         |
|            | proline                     | 0.62           | 0.24         |
|            | carnitine                   | 0.45           | 0.17         |
|            | hydroxyproline              | 0.37           | 0.10         |
| Cluster 8  | arginine                    | 0.57           | 0.23         |
|            | glycine                     | 0.45           | 0.05         |
|            | serine                      | 0.78           | 0.18         |
| Cluster 9  | cotinine                    | 1.00           | 0.01         |
| Cluster 10 | creatine                    | 0.61           | 0.03         |
|            | thyroxine                   | 0.61           | 0.04         |
| Cluster 11 | allantoin                   | 0.69           | 0.15         |
|            | carbamoylalanine            | 0.69           | 0.18         |



**Supplementary Table 10. Metabolite clusters derived from principal components analyses: CMH method**

| Cluster           | Metabolite                                                                           | R <sup>2</sup> |              |
|-------------------|--------------------------------------------------------------------------------------|----------------|--------------|
|                   |                                                                                      | Own Cluster    | Next Closest |
| <b>Cluster 1</b>  | aconitate                                                                            | 0.88           | 0.19         |
|                   | citrate                                                                              | 0.70           | 0.12         |
|                   | isocitrate                                                                           | 0.75           | 0.20         |
|                   | malate                                                                               | 0.59           | 0.25         |
| <b>Cluster 2</b>  | aminoadipate                                                                         | 0.40           | 0.04         |
|                   | kynurenine                                                                           | 0.67           | 0.08         |
|                   | quinolinate                                                                          | 0.57           | 0.10         |
|                   | urate                                                                                | 0.24           | 0.06         |
|                   | indoxylsulfate                                                                       | 0.22           | 0.03         |
|                   | xanthurenate                                                                         | 0.23           | 0.05         |
| <b>Cluster 3</b>  | alpha-glycerophosphate                                                               | 0.54           | 0.11         |
|                   | adenosine diphosphate                                                                | 0.53           | 0.07         |
|                   | lactose                                                                              | 0.59           | 0.12         |
| <b>Cluster 4</b>  | glycocholate                                                                         | 0.75           | 0.05         |
|                   | glycodeoxycholate; glycochenodeoxycholate                                            | 0.85           | 0.08         |
|                   | deoxycholates                                                                        | 0.33           | 0.02         |
| <b>Cluster 5</b>  | pantothenate                                                                         | 0.75           | 0.02         |
|                   | pyridoxate                                                                           | 0.79           | 0.04         |
|                   | oxalate                                                                              | 0.14           | 0.02         |
| <b>Cluster 6</b>  | hippurate                                                                            | 0.30           | 0.02         |
|                   | gentisate                                                                            | 0.50           | 0.02         |
|                   | salicylurate                                                                         | 0.41           | 0.02         |
|                   | hydroxyphenylacetate                                                                 | 0.50           | 0.11         |
| <b>Cluster 7</b>  | fructose; glucose; galactose                                                         | 0.50           | 0.07         |
|                   | sorbitol                                                                             | 0.49           | 0.08         |
|                   | sucrose                                                                              | 0.47           | 0.08         |
| <b>Cluster 8</b>  | alpha-hydroxybutyric acid                                                            | 0.78           | 0.13         |
|                   | beta-hydroxybutyric acid                                                             | 0.78           | 0.15         |
| <b>Cluster 9</b>  | fumarate; maleate; alpha-ketoisovalerate                                             | 0.42           | 0.15         |
|                   | glucuronate                                                                          | 0.28           | 0.04         |
|                   | lactate                                                                              | 0.44           | 0.13         |
|                   | hydroxyglutarate                                                                     | 0.53           | 0.06         |
| <b>Cluster 10</b> | phosphoglycerate                                                                     | 0.51           | 0.01         |
|                   | adenosine monophosphate                                                              | 0.70           | 0.18         |
|                   | fructose-1-phosphate; fructose-6-phosphate; glucose-1-phosphate; glucose-6-phosphate | 0.55           | 0.17         |

|                   |                                   |      |      |
|-------------------|-----------------------------------|------|------|
| <b>Cluster 11</b> | adipate                           | 0.71 | 0.08 |
|                   | 3-methyladipic acid; pimelic acid | 0.71 | 0.05 |
| <b>Cluster 12</b> | uridine                           | 0.57 | 0.05 |
|                   | phosphocreatine                   | 0.57 | 0.01 |

**Supplementary Table 11. Metabolite clusters derived from principal components analyses: Lipid method**

| Cluster   | Metabolite | R <sup>2</sup> |              |
|-----------|------------|----------------|--------------|
|           |            | Own Cluster    | Next Closest |
| Cluster 1 | DAG 34:1   | 0.69           | 0.60         |
|           | DAG 36:1   | 0.64           | 0.55         |
|           | TAG 44:1   | 0.82           | 0.49         |
|           | TAG 46:2   | 0.89           | 0.52         |
|           | TAG 48:3   | 0.88           | 0.56         |
|           | TAG 48:2   | 0.96           | 0.56         |
|           | TAG 48:1   | 0.90           | 0.53         |
|           | TAG 48:0   | 0.73           | 0.36         |
|           | TAG 50:3   | 0.83           | 0.59         |
|           | TAG 50:2   | 0.88           | 0.49         |
|           | TAG 52:1   | 0.85           | 0.48         |
| Cluster 2 | LPC 14:0   | 0.65           | 0.43         |
|           | PC 32:2    | 0.83           | 0.35         |
|           | PC 32:1    | 0.77           | 0.49         |
|           | PC 34:4    | 0.77           | 0.40         |
|           | PC 34:3    | 0.73           | 0.43         |
|           | PC 34:1    | 0.65           | 0.46         |
|           | PC 36:1    | 0.52           | 0.37         |
| Cluster 3 | TAG 48:4   | 0.63           | 0.55         |
|           | TAG 50:5   | 0.72           | 0.41         |
|           | TAG 50:4   | 0.83           | 0.66         |
|           | TAG 52:6   | 0.89           | 0.54         |
|           | TAG 52:5   | 0.94           | 0.64         |
|           | TAG 52:4   | 0.75           | 0.68         |
|           | TAG 54:8   | 0.82           | 0.57         |
|           | TAG 54:7   | 0.88           | 0.70         |
|           | TAG 54:6   | 0.90           | 0.59         |
|           | TAG 54:5   | 0.64           | 0.48         |
| Cluster 4 | LPC 16:1   | 0.68           | 0.36         |
|           | LPC 16:0   | 0.81           | 0.47         |
|           | LPC 18:1   | 0.73           | 0.50         |
|           | LPC 18:0   | 0.76           | 0.42         |
|           | LPC 20:3   | 0.59           | 0.45         |
|           | LPE 16:0   | 0.56           | 0.32         |
|           | LPE 18:1   | 0.56           | 0.30         |
|           | LPE 18:0   | 0.69           | 0.32         |
|           | LPE 20:4   | 0.49           | 0.35         |
|           | LPE 22:6   | 0.77           | 0.42         |
| Cluster 5 | CE 16:0    | 0.68           | 0.15         |
|           | CE 18:3    | 0.63           | 0.26         |
|           | CE 18:2    | 0.75           | 0.38         |

|            |           |      |      |
|------------|-----------|------|------|
|            | CE 18:1   | 0.75 | 0.18 |
|            | CE 18:0   | 0.37 | 0.24 |
|            | CE 20:5   | 0.51 | 0.18 |
|            | CE 20:4   | 0.82 | 0.35 |
|            | CE 20:3   | 0.71 | 0.19 |
|            | CE 22:6   | 0.66 | 0.28 |
| Cluster 6  | SM 14:0   | 0.54 | 0.27 |
|            | SM 16:1   | 0.80 | 0.32 |
|            | SM 16:0   | 0.71 | 0.21 |
|            | SM 18:1   | 0.70 | 0.11 |
|            | SM 18:0   | 0.73 | 0.18 |
|            | SM 22:1   | 0.73 | 0.19 |
|            | SM 22:0   | 0.37 | 0.17 |
| Cluster 7  | DAG 34:2  | 0.68 | 0.55 |
|            | DAG 36:2  | 0.84 | 0.48 |
|            | TAG 52:3  | 0.72 | 0.44 |
|            | TAG 52:2  | 0.74 | 0.60 |
|            | TAG 54:4  | 0.44 | 0.27 |
|            | TAG 54:3  | 0.84 | 0.41 |
|            | TAG 54:2  | 0.81 | 0.56 |
|            | TAG 56:4  | 0.68 | 0.47 |
|            | TAG 56:3  | 0.81 | 0.47 |
| Cluster 8  | SM 24:0   | 0.44 | 0.24 |
|            | TAG 54:9  | 0.65 | 0.18 |
|            | TAG 56:10 | 0.83 | 0.28 |
|            | TAG 58:12 | 0.77 | 0.16 |
|            | TAG 58:11 | 0.68 | 0.15 |
|            | TAG 60:12 | 0.52 | 0.29 |
| Cluster 9  | LPE18:2   | 0.61 | 0.32 |
|            | PC 34:2   | 0.67 | 0.32 |
|            | PC A36:4  | 0.63 | 0.16 |
|            | PC 36:2   | 0.76 | 0.27 |
| Cluster 10 | PC 32:0   | 0.56 | 0.40 |
|            | PC B36:4  | 0.83 | 0.36 |
|            | PC 36:3   | 0.81 | 0.58 |
|            | PC 38:5   | 0.77 | 0.37 |
|            | PC 38:4   | 0.79 | 0.30 |
| Cluster 11 | PC 38:6   | 0.57 | 0.30 |
|            | PC 40:6   | 0.56 | 0.34 |
|            | TAG 56:9  | 0.60 | 0.52 |
|            | TAG 56:8  | 0.91 | 0.61 |
|            | TAG 56:7  | 0.94 | 0.56 |
|            | TAG 56:6  | 0.72 | 0.40 |
|            | TAG 56:5  | 0.59 | 0.47 |
|            | TAG 58:10 | 0.59 | 0.31 |

|            |          |      |      |
|------------|----------|------|------|
|            | TAG 58:9 | 0.90 | 0.41 |
|            | TAG 58:8 | 0.82 | 0.29 |
| Cluster 12 | LPC 18:2 | 0.60 | 0.42 |
|            | LPC 20:5 | 0.58 | 0.21 |
|            | LPC 20:4 | 0.85 | 0.57 |
|            | LPC 22:6 | 0.75 | 0.38 |
| Cluster 13 | PC 38:3  | 0.71 | 0.29 |
|            | PC 38:2  | 0.82 | 0.29 |
|            | SM 24:1  | 0.46 | 0.14 |
| Cluster 14 | CE 14:0  | 0.73 | 0.17 |
|            | CE 16:1  | 0.73 | 0.23 |

CE, cholesterol ester; DAG, diacylglycerol; LPC, lysophosphatidylcholine; LPE, lysophosphatidylethanolamine; PC, phosphatidylcholine; SM, sphingomyelin; TAG, triacylglycerol.
